# Supplementary material for: Meta-Analysis of the Effect of Subsurface Irrigation on Crop Yield and Water Productivity
Source: MDPI journal article supplement (doi:10.3390/su152215716), 2023-11-08
Supplement: s1 [file s1]

**Table S1.** Details of the publications.

| Title                                                                                                                                        | Author                                           | Publication Titles                      | Publication Year |
|----------------------------------------------------------------------------------------------------------------------------------------------|--------------------------------------------------|-----------------------------------------|------------------|
| Study on Water-saving and Yield-increasing Mechanism and Appropriate Model of Winter wheat and Summer maize under Subsurface Drip Irrigation | Yang Mingda.                                     | Henan Agricultural University           | 2021             |
| Effects of Moistube Irrigation on Winter Wheat's Yield and Irrigation Water Use Efficiency                                                   | Zhang Mingzhi, Niu Wenquan, Lu Zhenguang, et al. | Journal of Irrigation and Drainage      | 2017             |
| Effect of Deep Subsurface Irrigation on Evapotranspiration and Water Use Efficiency of Winter Wheat Based on Weighing Lysimeters             | Song Wenpin, Wang Zhimin, Chen Xiaoli, et al.    | Journal of Triticeae Crops              | 2016             |
| Effects of irrigation models on the space distribution of root system and yield of winter wheat                                              | Wang Jiandong, Gong Shihong, Xu Di, et al.       | Journal of Hydraulic Engineering        | 2011             |
| Effect of Different Infiltrating Irrigation and Film Mulching on WUE and Yield of Winter Wheat                                               | Pei Yanting, Tian Qizhuo, Li Nana, et al.        | Journal of Triticeae Crops              | 2009             |
| Study on Efficient Utilization of Water and Fertilizer for Winter Wheat under Drip Irrigation in Yili River Basin                            | Jiang Yuxin.                                     | Shihezi University                      | 2020             |
| Water-Saving Potential of Subsurface Drip IrrigationFor Winter Wheat                                                                         | Jiang Hanbing, Yao Jiawei, Qi Yongqing           | Sustainability                          | 2020             |
| The Effect of Water Regulation on Agronomic Traits and Water Use Efficiency of Winter Wheat                                                  | Xue Tingting, Ma juanjuan, Sun Xihuan            | China Rural Water and Hydropower        | 2020             |
| Effects of deep irrigation on water consumption and water use efficiency of winter wheat                                                     | Huang Jie, Sun Xiahuan, Ma Juanjuan, et al.      | Agricultural Research in the Arid Areas | 2017             |
| The influence of different water supplied on root morphology and water uptake ability in winter wheat                                        | Wang Bing.                                       | Taiyuan University of Technology        | 2017             |
| Growth and root water absorption model of winter wheat under different water irrigation conditions                                           | Wang Pu.                                         | Taiyuan University of Technology        | 2018             |
| Study on irrigation strategy and root distribution prediction model of winter wheat under deep irrigation                                    | Ge Zhiyuan.                                      | Taiyuan University of Technology        | 2019             |
| Effect of water control in combination of                                                                                                    | Ren Wei, Yao                                     | Chinese                                 | 2003             |

|                                                                                                                                             |                                                  |                                                |      |
|---------------------------------------------------------------------------------------------------------------------------------------------|--------------------------------------------------|------------------------------------------------|------|
| depth and amount on dry matter partition and water use efficiency of winter wheat                                                           | Kemin, Yu Qiang, et al.                          | Journal of Eco-Agriculture                     |      |
| Effects of Shallow Drip Irrigation with Covering Soil on Water Consumption and Water Use Efficiency of Spring Wheat                         | Tian Xulang, Wang Zhenhua, Li Wenhao, et al.     | Chinese Journal of Soil Science                | 2022 |
| Effects of drip irrigation on root activity pattern, root-sourced signal characteristics and yield stability of winter wheat                | Ma Shoutian, Wang Tongchao, Ma Shouchen          | Agricultural Water Management                  | 2022 |
| Performance Automation Controller of Drip Irrigation Systems Using Saline Water for Wheat Yield and Water Productivity in Egypt             | Mansour H A, Abd El-Hady M, Bralts V F, et al.   | Journal of Irrigation and Drainage Engineering | 2016 |
| Effects of the irrigation quota and drip irrigation pipes spacing on growth and development of summer maize with subsurface drip irrigation | Yao Jiawei, Qi Yongqing, Li Huaihui, et al.      | Chinese Journal of Eco-Agriculture             | 2021 |
| Effect of subsurface irrigation on growth index and yield of maize                                                                          | Zhao Jinghua, Yang Tingrui, Zhou Heping, et al.  | Journal of Gansu Agricultural University       | 2020 |
| Infiltration of irrigation water and energy saving test of maize (in Chinese)                                                               | Zhou Heping, Zhao Jinghua, Zhang Na, et al.      | Scientia Sinica(Technologica)                  | 2018 |
| Effect of Micro-irrigation on Water Consumption and Output of Corn                                                                          | Wang Yazhu, Wang Jianping.                       | Water Saving Irrigation                        | 2019 |
| Effect of different drip irrigation modes on spatial distribution variance of soil water and summer maize growth                            | Yang Mingda, Guan Xiaokang, Bai Tiantian, et al. | Journal of Henan Agricultural University       | 2016 |
| Application of Subsurface Drip Irrigation to Maize Field in Aeolian Sandy Soil                                                              | Dou Chaoyin, Meng Weizhong, Tong Wei, et al.     | Journal of Irrigation and Drainage             | 2018 |
| Effects of drip fertigation yield, nutrient and water productivity and root distribution of spring maize                                    | Wu Dali.                                         | China Agricultural University                  | 2018 |
| Mechanism of Vertical Partial Root-zone Alternative Irrigation on Growth, Physiological and Yield of Summer Maize                           | Cao Yunxin.                                      | North West Agriculture and Forestry University | 2021 |

|                                                                                                                                                    |                                             |                                                                       |      |
|----------------------------------------------------------------------------------------------------------------------------------------------------|---------------------------------------------|-----------------------------------------------------------------------|------|
| Influences of micro-irrigation and subsoiling before planting on enzyme activity in soil rhizosphere and summer maize yield                        | Zhang Mingzhi, Niu Wenquan, Xu Jian, et al. | Chinese Journal of Applied Ecology                                    | 2016 |
| Effects of Mulched Drip Irrigation and Subsurface Drip Irrigation on Corn Water Consumption, Growth and Yield                                      | Yuan Jiangjie, Li Guangyong, Yuan Zicheng.  | Journal of Irrigation and Drainage                                    | 2015 |
| Effects of Different Ways of Micro-moist Irrigation on Growth and Yield of Maize                                                                   | He Yuqin, Cheng Ziyong, Zhang Rui, et al.   | Journal of South China Agricultural University                        | 2012 |
| Water and Nitrogen Distribution and Summer Maize Growth in Subsurface Drip Irrigation System as Affected by Spatial Variations of Soil Properties  | Li Jiusheng, Du Zhenhua, Li Yanfeng, et al. | Scientia Agricultura Sinica                                           | 2008 |
| Effects of drip irrigation placement depth on distribution of soil water & nitrogen and spring maize yield                                         | Li Bei, Li Jiusheng.                        | Journal of China Institute of Water Resources and Hydropower Research | 2009 |
| Experimental Research on Effect of Water-Saving and Yield Increase for Maize under Different Irrigation Techniques                                 | Li Xiaoling, Liu Puhai, Cheng Ziyong.       | Water Saving Irrigation                                               | 2006 |
| Modeling of Different Irrigation Methods for Maize Using AquaCrop Model: Case Study                                                                | Thamer T, Nassif N, Almaeini A, et al.      | Engineering                                                           | 2021 |
| Comparing evapotranspiration and yield performance of maize under sprinkler, superficial and subsurface drip irrigation in a semi-arid environment | Valentín F, Nortes P A, Domínguez A, et al. | Irrigation Science                                                    | 2020 |
| Evaluation of subsurface, mulched and non-mulched surface drip irrigation for maize production and economic benefits in northeast China            | Wang Dan, Li Guangyong, Mo Yan, et al.      | Irrigation Science                                                    | 2021 |
| Improving silage maize productivity using recycled wastewater under different irrigation methods                                                   | Cakmakci T, Sahin U.                        | Agricultural Water Management                                         | 2021 |

|                                                                                                                                                                                                  |                                                   |                                              |      |
|--------------------------------------------------------------------------------------------------------------------------------------------------------------------------------------------------|---------------------------------------------------|----------------------------------------------|------|
| Efficacy of subsurface and surface drip irrigation regarding water productivity and yield of maize                                                                                               | Muneer M A, Arshad M, Shahid M A, et al.          | Pakistan Journal of Agricultural Sciences    | 2022 |
| Study on agronomic measure of spring maize hole irrigation sowing in hilly dry land of Sichuan Province                                                                                          | Shi Kai, Wang Xiaochun, Chen Cheng, et al.        | Journal of Northeast Agricultural University | 2020 |
| Effect of shallow-buried drip irrigation on water consumption characteristics and yield of spring maize in semi-arid region of western Liaoning                                                  | Guo Jinlu, Gu Jian, Yin Guanghua, et al.          | Chinese Journal of Ecology                   | 2017 |
| Effects of Mulched and Soil Covered Drip Irrigation on Growth of Maize in West Liaohe Plain                                                                                                      | Jia Qiong, Shi Haibin, Li Ruiping, et al.         | Journal of Soil and Water Conservation       | 2021 |
| Difference analysis on seed yield and root cap characteristics for spring maize under water fertilizer and high yield optimization of shallow burying drip irrigation                            | Gao Xin, Yang Hengshan, Zhao Peijun, et al.       | Acta Agriculturae Zhejiangensis              | 2022 |
| Root Under Shallow-buried Drip Irrigation Effects of Irrigation Quota on Morphological and Physiological Characteristics of Maize Root Under Shallow-buried Drip Irrigation                      | Guo Zihe, Yang Hengshan, Zhao Peijun, et al.      | Chinese Agricultural Science Bulletin        | 2022 |
| Effects of different irrigation methods on root morphological and physiological biochemical characteristics of maize in the West Liaohe Plain                                                    | Xue Xinwei, Yang Hengshan, Zhang Ruifu.           | Agricultural Research in the Arid Areas      | 2022 |
| Effects of reduction of nitrogen and water of shallow drip irrigation on material distribution of root and canopy and utilization efficiency of water and nitrogen of maize under dense planting | Zhang Yushan, Yang Hengshan, Ge Xuanliang, et al. | Agricultural Research in the Arid Areas      | 2022 |
| Effects of irrigation methods on yield and water and nitrogen utilization efficiency of spring maize in Xiliaohe Plain, China                                                                    | Meng Fanhao, Yang Hengshan, Zhang Ruifu, et al.   | Acta Agriculturae Zhejiangensis              | 2022 |
| Effects of Different Drip Irrigation Modes on Starch Accumulation and Activities of Starch Synthesis-Related Enzyme of Spring Maize Grain in Northeast China                                     | Zhang Jiahua, Yang Hengshan, Zhang Yuqin, et al.  | Scientia Agricultura Sinica                  | 2022 |

|                                                                                                                                                                              |                                                      |                                                |      |
|------------------------------------------------------------------------------------------------------------------------------------------------------------------------------|------------------------------------------------------|------------------------------------------------|------|
| Effects of Optimal Nitrogen Application on Carbon and Nitrogen Footprints of Spring Maize Fields Under Shallow Buried Drip Irrigation in the Xiliaohe Plain                  | Tai Jicheng, Li Rui, Yang Hengshan, et al.           | Journal of Soil and Water Conservation         | 2021 |
| Effect of Reduction of Nitrogen and Irrigation on Dry Matter Accumulation and Utilization Efficiency of Water and Nitrogen of Spring Maize in Shallow Drip Irrigation        | Zhang Mingwei, Yang Hengshan, Fan Xiuyan, et al.     | Journal of Maize Sciences                      | 2022 |
| Maize response to irrigation and nitrogen under center pivot, subsurface drip and furrow irrigation: Water productivity, basal evapotranspiration and yield response factors | Mohammed A T, Irmak S.                               | Agricultural Water Management                  | 2022 |
| Assessment of fodder corn grown under surface and subsurface drip irrigation in Mendoza, Argentina                                                                           | Ortega Justavino R J, Loyola P F, Llera Giménez J A. | Revista de la Facultad                         | 2021 |
| Evapotranspiration and components of corn ( <i>Zea mays</i> L.) under micro irrigation systems in a semi-arid environment                                                    | Dehghanisanij H, Kanani E, Akhavan S.                | Spanish journal of agricultural research       | 2020 |
| Narrow row corn production with subsurface drip irrigation                                                                                                                   | Stone K C, Bauer P J, Busscher W J, et al.           | Applied Engineering in Agriculture             | 2008 |
| The Effects of Irrigation Methods with Effluent and Irrigation Scheduling on Water Use Efficiency and Corn Yields in an Arid Region                                          | Hassanli A M, Ebrahimizadeh M A, Beecham S.          | Agricultural water management                  | 2009 |
| Corn and sorghum ET, E, yield, and CWP as affected by irrigation application method: SDI versus mid-elevation spray irrigation                                               | Evet S R, Marek G W, Colaizzi P D, et al.            | Transactions of the ASABE                      | 2019 |
| Research on the Effects of Subsurface Drip Irrigation In Cotton                                                                                                              | Kong Fanming.                                        | Shihezi University                             | 2013 |
| The Effect of Drip Irrigation with Saline Water to the Distribution of Salt and Development and Yield of Cotton                                                              | Wang Yanna, Hou Zhenan, Gong Jiang, et al.           | Journal of Shihezi University(Natural Science) | 2007 |
| Research on Influence of Subsurface                                                                                                                                          | Wang Zhenhua,                                        | Water Saving                                   | 2006 |

|                                                                                                                                                            |                                                 |                                         |      |
|------------------------------------------------------------------------------------------------------------------------------------------------------------|-------------------------------------------------|-----------------------------------------|------|
| Drip Irrigation on Cotton Physiology Character and Yield in Xinjiang                                                                                       | Lv Desheng, Wen Xinming, et al.                 | Irrigation                              |      |
| Effect of Pipeline Buried Depth and Water Amount of Trace Irrigation on Cotton Quality and Yield                                                           | Chen Liyu, Zhang Lifeng, Lu Zhanyuan, et al.    | Water Saving Irrigation                 | 2020 |
| Effect of Irrigation Amount and Buried Depth of Drip Irrigation Tape on Cotton Production in Subsurface Drip Irrigation and No Mulch Plastic Film Farmland | Xie Haixia, He Shuai, Zhou Jianwei, et al.      | Journal of Irrigation and Drainage      | 2012 |
| Effects of soil salinity on growth and nutrition absorption of Cotton under surface and subsurface drip irrigation                                         | Ma Li.                                          | Shihezi University                      | 2008 |
| Assessment of water productivity using different drip irrigation systems for cotton                                                                        | Çetin O, Kara A.                                | Agricultural Water Management           | 2019 |
| Utilizing Subsurface Drip Irrigation and Conservation Tillage in Cotton Production Systems                                                                 | Sij J W, Bordovsky D G, Jones D L, et al.       | SRX Agriculture                         | 2010 |
| Effect of Subsurface Drip Irrigation on Cotton Plantations                                                                                                 | Kalfountzos D, Alexiou I, Kotsopoulos S, et al. | Water Resources Management              | 2006 |
| Water distribution from a subsurface drip irrigation system and dripline spacing effect on cotton yield and water use efficiency in a coastal plain soil   | Grabow G L, Huffman R L, Evans R O, et al.      | Transactions of the ASABE               | 2006 |
| Improving Cotton Yield, Water Use and Net Income in Different Drip Irrigation Systems Using Real-Time Crop Evapotranspiration                              | Çetin Ö, Üzen N, Temiz M G, et al.              | Polish Journal of Environmental Studies | 2021 |
| Cotton Subsurface Drip and Overhead Irrigation Efficiency, Maturity, Yield, and Quality                                                                    | Whitaker J R, Ritchie G L, Bednarz C W, et al.  | Agronomy journal                        | 2008 |
